1 Title:

2 QTL mapping reveals complex genetic architecture of quantitative virulence in the  
3 wheat pathogen *Zymoseptoria tritici*

4

5

6 Authors:

7 Ethan L. Stewart, Daniel Croll, Mark H. Lendenmann, Andrea Sanchez-Vallet, Fanny E.  
8 Hartmann, Javier Palma-Guerrero, Xin Ma, Bruce A. McDonald.

9

10 Authors Address:

11 Plant Pathology Group, ETH Zürich, Universitätstrasse 2, 8092, Zürich, Switzerland.

12

13 Corresponding Author:

14 Ethan Stewart

15 ethan.stewart@usys.ethz.ch

16 +41 44 632 38 64

17

18 Key Words

19 QTL mapping, quantitative virulence, *Zymoseptoria tritici*, *Mycosphaerella graminicola*,  
20 image analysis.

21

22 Word count: 7180

## 23 **Summary**

24 We conducted a comprehensive analysis of virulence in the fungal wheat pathogen  
25 *Zymoseptoria tritici* using QTL mapping. High throughput phenotyping based on  
26 automated image analysis allowed measurement of pathogen virulence on a scale and  
27 with a precision that was not previously possible. Across two mapping populations  
28 encompassing more than 520 progeny, 540,710 pycnidia were counted and their sizes  
29 and grey values were measured, yielding over 1.6 million phenotypes associated with  
30 pathogen reproduction. Large pycnidia were shown to produce more numerous and  
31 larger spores than small pycnidia. Precise measures of percent leaf area covered by  
32 lesions provided a quantitative measure of host damage. Combining these large and  
33 accurate phenotype datasets with a dense panel of RADseq genetic markers enabled us  
34 to genetically dissect pathogen virulence into components related to host damage and  
35 components related to pathogen reproduction. We show that different components of  
36 virulence can be under separate genetic control. Large- and small-effect QTLs were  
37 identified for all traits, with some QTLs specific to mapping populations, cultivars and  
38 traits and other QTLs shared among traits within the same mapping population. We  
39 associated the presence or absence of accessory chromosomes with several virulence  
40 traits, providing the first evidence for an important function associated with accessory  
41 chromosomes in this organism. A large-effect QTL involved in host specialization was  
42 identified on chromosome 7, leading to identification of candidate genes having a large  
43 effect on virulence.

44

## 45 **Introduction**

46

47 Much plant pathology research has been oriented around understanding the classic  
48 gene-for-gene (GFG) interaction (Flor, 1955) between the pathogen and its host, largely  
49 because early plant breeding programs focused on the introgression of major,  
50 qualitative resistance genes (R-genes) to control plant pathogens. Because most  
51 pathogens evolved quickly to defeat major R-genes, and quantitative resistance  
52 appeared more durable, the genetic basis of quantitative resistance became an area of  
53 intensive investigation, leading eventually to identification of host genes encoding  
54 quantitative resistance (Krattinger et al, 2009, St. Clair, 2010). The term aggressiveness  
55 is typically used by plant pathologists to describe the quantitative degree of damage  
56 caused by a pathogen strain. In the broader literature, virulence is defined as the  
57 quantitative degree of damage caused by a pathogen to its host. We will use the latter  
58 definition to be consistent with the wider field of life sciences. In contrast to  
59 quantitative resistance in the host, quantitative virulence in pathogens is much less  
60 studied and remains poorly understood (Lannou, 2012, Pariaud et al, 2009), though  
61 quantitative virulence appears to be common in plant pathogens (Pariaud et al, 2009).

62

63 Given the broad spectrum in observed virulence phenotypes, the genetic architecture of  
64 virulence may be mediated both by single genes of large effect that follow the GFG  
65 model (Flor, 1955) and by many genes that make smaller contributions to quantitative  
66 virulence. Quantitative traits often exhibit a continuous distribution in a population and  
67 are typically governed by independent assortment of multiple alleles with small  
68 individual effects, with different combinations of alleles responsible for the range of  
69 observed phenotypes in recombining populations (Mackay 2001). Numerous  
70 confounding factors such as dominance, pleiotropy and additive allele effects also  
71 contribute to the genetic architecture of a trait (Hansen 2006). In order to disentangle

72 individual loci contributing to overall virulence phenotypes, we utilized quantitative  
73 trait locus (QTL) mapping, an established technique for determining the genetic  
74 architecture of quantitative traits. QTL mapping was successfully used to identify  
75 candidate genes underlying traits of interest in plants (Alonso-Blanco and Méndez-Vigo,  
76 2014), animals (Solberg Woods, 2014) and humans (Almasy and Blangero, 2009). It has  
77 also been employed in fungi (Larraya et al, 2003), though its use in fungi remains rare  
78 compared to other eukaryotes (Foulongne-Oriol, 2012).

79

80 Virulence in the wheat pathogen *Zymoseptoria tritici* (formerly *Mycosphaerella*  
81 *graminicola*), causal agent of Septoria tritici blotch (STB), is a predominantly  
82 quantitative trait (Stewart and McDonald 2014, Zhan et al, 2007). *Z. tritici* is the most  
83 damaging wheat pathogen in Europe (Jorgensen et al, 2014; O'Driscoll et al, 2014) and  
84 is considered an important fungal pathogen worldwide (Dean et al, 2012). Under  
85 optimal conditions, yield losses can reach 50% (Eyal 1987). Even with the use of  
86 resistant cultivars and regular fungicide treatments, yield losses of 5–10% can be  
87 expected (Fones and Gurr, 2015). Ten to fourteen days after infection chlorotic areas  
88 begin to appear that later become necrotic lesions. Pycnidia containing asexual  
89 pycnidiospores develop mostly within these necrotic lesions in the sub-stomatal  
90 cavities. Pycnidiospores are exuded from the pycnidia in a gelatinous cirrhous during  
91 periods of high humidity and are spread throughout the plant canopy by rain splash.  
92 Numerous asexual infection cycles occurring during a growing season are the main  
93 cause of STB epidemics in the field.

94

95 Despite its agricultural importance, the mechanisms responsible for virulence in *Z.*  
96 *tritici* and their underlying genetics remain poorly understood. Twenty genes affecting

97 virulence in *Z. tritici* have been described and functionally characterized (Figure S1).  
98 Most of these genes have developmental regulatory functions or affect inherent fitness  
99 without having a specific role in virulence. Host resistance is also quantitative, with 21  
100 genes and 89 genomic regions implicated in resistance to *Z. tritici* (Brown et al, 2015).  
101 The quantitative nature of virulence in *Z. tritici* makes QTL mapping an ideal technique  
102 to elucidate the genetic determinants of quantitative virulence, as already validated  
103 using several other quantitative traits in *Z. tritici* (Lendenmann et al, 2014, Lendenmann  
104 et al, 2015, Lendenmann et al, 2016).

105

106 Epidemic development is strongly affected by the ability of a pathogen to reproduce and  
107 cause subsequent infections (Parlevliet, 1979), hence the reproductive output of a  
108 pathogen is an important determinant of the total damage it can cause during an  
109 epidemic. Damage caused by plant pathogens is frequently assessed by quantifying the  
110 area covered by disease lesions on the host. However, a pathogen's ability to induce  
111 lesions does not necessarily reflect its ability to reproduce. Indeed, several studies have  
112 shown that pathogen damage, as indicated by the plant area covered by disease lesions,  
113 can be independent of pathogen reproduction, as indicated by the number of spores  
114 produced during an infection (Burns et al, 2014, Habgood, 1977, Halama et al, 1999,  
115 Pariaud et al, 2009, Twizeyimana et al, 2014), suggesting that these traits may be under  
116 separate genetic control. The contribution of each virulence component combines to  
117 produce quantitative disease phenotypes.

118

119 The success of a QTL mapping project depends on the availability of genetic markers  
120 and accurate phenotypic data. With current availability of genomic tools that can  
121 generate very large numbers of genetic markers comparatively easily and cheaply, the

122 limiting factor in most studies is accurate phenotyping (Furbank and Tester, 2011).  
123 Using image analysis to phenotype *Z. tritici* infection allows for measurement of both  
124 leaf damage, based on the percentage of the leaf covered by necrotic lesions, and  
125 pathogen reproduction, based on the number and size of the pycnidia formed on the  
126 infected leaves (Stewart and McDonald 2014, Stewart et al, 2016).

127

128 The aim of this study was to investigate the genetic architecture of virulence traits in *Z.*  
129 *tritici*. We conducted a QTL mapping study using two mapping populations derived  
130 from parental isolates exhibiting varying degrees of virulence. Combining digital image  
131 analysis with a large number of RADseq SNP markers in a large number of offspring  
132 allowed us to genetically separate traits related to host damage and pathogen  
133 reproduction. We also identified novel candidate genes involved in host specialization  
134 and virulence.

135

136

## 137 **Results**

138

### 139 **Phenotyping**

140 A phenotyping method based on digital image analysis (Stewart and McDonald, 2014)  
141 was used to measure % leaf area covered by lesions (PLACL), pycnidia density (# of  
142 pycnidia per cm<sup>2</sup> leaf), pycnidia size and pycnidia melanization in two *Z. tritici* mapping  
143 populations (3D1x3D7 and 1A5x1E4) that have also been used to study melanization  
144 (Lendenmann et al, 2014), fungicide sensitivity (Lendenmann et al, 2015) and  
145 temperature sensitivity (Lendenmann et al, 2016). The pairs of parental isolates used to  
146 make the crosses were chosen based on differing levels of virulence observed in

147 previous work (Zhan et al, 2005). To investigate the effect of host on virulence, we used  
148 cultivars Runal (moderately susceptible to *Z. tritici*) and Titlis (moderately resistant)  
149 (Courvoisier et al, 2015). All phenotypes showed a continuous distribution in both  
150 crosses. Transgressive segregation was evident for all phenotypes, with some progeny  
151 exhibiting more extreme phenotypes than the parent isolates (Figure 1). In cross  
152 3D1x3D7 all phenotypes were significantly higher on Runal than Titlis, including mean  
153 pycnidia size (F=3.93, p=0.048), pycnidia melanization (F=22.7, p<0.001), PLACL  
154 (F=21.4, p<0.001), and pycnidia density (F=19.2, p<0.001). In cross 1A5x1E4, PLACL  
155 (F=22.7, p<0.001) and pycnidia melanization (F=17.7, p<0.001) were significantly  
156 higher in Runal whereas pycnidia size (F=11.5, p<0.001) and pycnidia density (F=73.6,  
157 p<0.001) were significantly higher in Titlis. Across both crosses, a total of 540,710  
158 pycnidia were counted and their sizes and melanization measured, yielding over 1.6  
159 million phenotypic data points associated with fungal fruiting bodies. In order to  
160 evaluate whether counting and measuring pycnidia provides an accurate estimate of  
161 spore number, the spore output of a subset of isolates was measured. The mean number  
162 of spores per pycnidium was 2598. The mean spore size, as measured by length, was  
163 17.6  $\mu\text{m}$ . There were weak but significant positive correlations between pycnidia size  
164 and spore size ( $r^2=0.111$ , p=0.001) and between pycnidia size and the number of spores  
165 per pycnidium ( $r^2= 0.112$ , p=0.001). These findings indicate that pycnidia size is  
166 correlated with reproductive output of *Z. tritici*.

167

#### 168 Quantitative Trait Locus (QTL) mapping

169 We used QTL mapping to elucidate the genetic architecture of the quantitative virulence  
170 phenotypes. QTLs were identified for all phenotypes. All QTLs in cross 3D1x3D7 were  
171 found only on Runal and mapped to a single large effect QTL on chromosome 7 (Figure

172 2a). In 1A5x1E4 the same QTL for pycnidia density was found on chromosome 5 on  
173 both cultivars. A second QTL for pycnidia density was found on chromosome 9 in Titlis  
174 and on chromosome 3 in Runal. PLACL in Titlis and pycnidia grey value in Runal both  
175 mapped to the same QTL on chromosome 5. Pycnidia size also mapped to the same QTL  
176 on chromosome 3 in cv Runal (Figure 2b). No QTLs were shared between the two  
177 crosses. The 95% confidence interval for a QTL ranged from 91.3 kb for the  
178 chromosome 5 QTL in 1A5x1E4 to 717.7 kb for the chromosome 7 QTL for grey value  
179 on Runal in 3D1x3D7.

180

181 The single, large effect QTL on chromosome 7 in cross 3D1x3D7 explained 54% of the  
182 phenotypic variance for PLACL, 57% of the variance for pycnidia density and 18% of the  
183 variance for pycnidia grey value. PLACL and pycnidia density shared the same  
184 confidence interval containing 35 genes. The wider confidence interval for pycnidia  
185 grey value contained 227 genes (Table 1A). The allele from the 3D7 parent was  
186 responsible for higher PLACL and pycnidia density and decreased pycnidia  
187 melanization.

188

189 In cross 1A5x1E4 the variance explained by each QTL was smaller and ranged from  
190 6.1% for pycnidia density on Titlis to 8.7% for pycnidia size on Runal. The number of  
191 genes within each confidence interval was generally higher than in cross 3D1x3D7,  
192 ranging from 89 for grey value in Runal to 280 in the QTL on chromosome 5 for  
193 pycnidia density in Runal and PLACL in Titlis (Table 1B). The 1A5 allele was responsible  
194 for the higher phenotype values in the QTL on chromosome 5 whereas the 1E4 allele  
195 was responsible for the higher phenotype values in the chromosome 3 and 9 QTLs.

196



197 Additive effects were observed for the two QTLs found for pycnidia density in 1A5x1E4.  
198 On Runal, isolates with the 1A5 allele at the chromosome 5 QTL peak and the 1E4 allele  
199 at the chromosome 3 QTL peak had significantly higher pycnidia density than isolates  
200 with the reverse alleles ( $F=11.2$ ,  $p<0.001$ ) (Table 2A). On Titlis, isolates with the 1E4  
201 allele at the chromosome 9 QTL peak and the 1A5 allele at the chromosome 5 QTL peak  
202 had significantly higher phenotypes than isolates with the opposite allele combinations  
203 ( $F=19.1$ ,  $p<0.001$ ) (Table 2B). On both cultivars, isolates with the same parental allele  
204 at both QTL peaks were not different from each other and were intermediate to the  
205 isolates with the alleles coming from different parents.

206

#### 207 Effect of Accessory Chromosomes on Virulence

208 Among the parent isolates used to make the crosses, all accessory chromosomes were  
209 present in 3D1 whereas 3D7 was missing chromosomes 14, 15, 18 and 21. In the  
210 1A5x1E4 cross chromosome 17 was absent in 1E4. QTLs could only be mapped on  
211 chromosomes present in both parent isolates. No QTLs were found on the accessory  
212 chromosomes in either cross.

213

214 The presence or absence of accessory chromosomes was established for each of the  
215 progeny in cross 3D1x3D7. Chromosome 14 was absent in 67 (26%) progeny,  
216 chromosome 15 in 68 (26%) progeny, chromosome 18 in 77 (30%) progeny and  
217 chromosome 21 in 73 (28%) progeny. All accessory chromosomes were present at a  
218 significantly higher frequency than the expected 1:1 Mendelian inheritance ratio  
219 (chromosome 14:  $\chi^2 = 61.1$ ,  $p<0.001$ , chromosome 15:  $\chi^2 = 59.1$ ,  $p<0.001$ , chromosome  
220 18:  $\chi^2 = 43.1$ ,  $p < 0.001$ , chromosome 21:  $\chi^2 = 49.9$ ,  $p<0.001$ ). This is consistent with

221 previous work that reported skewed inheritance of accessory chromosomes in a subset  
222 of 48 isolates from the same population (Croll et al, 2013).

223

224 We studied the effect of accessory chromosome presence-absence on virulence. On  
225 Runal, isolates with chromosome 21 had significantly larger pycnidia ( $F=6.2$ ,  $p=0.014$ )  
226 than isolates without chromosome 21, but the effect size was small ( $\eta^2=0.023$ ). On Titlis,  
227 isolates with chromosome 18 had significantly larger pycnidia ( $F=5.0$ ,  $p=0.027$ ) and  
228 darker pycnidia ( $F=5.7$ ,  $p=0.018$ ) than isolates without chromosome 18. The effect sizes  
229 for pycnidia size ( $\eta^2=0.021$ ) and pycnidia melanisation ( $\eta^2=0.022$ ) were small. A  
230 significant interaction between chromosomes 15 and 18 was also observed for pycnidia  
231 size ( $F=7.0$ ,  $p=0.009$ ), with isolates having both accessory chromosomes showing larger  
232 pycnidia, but the effect size of the interaction was small ( $\eta^2=0.028$ ).

233

#### 234 Candidate genes for pathogen virulence within QTLs

235 In total, 918 candidate genes were identified in the 95% confidence intervals of all  
236 QTLs, including 227 from cross 3D1x3D7 and 691 from cross 1A5x1E4. No candidate  
237 genes were shared between the two crosses. In the literature to date, 20 genes have  
238 been implicated in virulence in *Z. tritici* and functionally characterized (Figure S1). None  
239 of the genes previously shown to play a role in virulence were found within the QTLs.

240

#### 241 In depth investigation of the chromosome 7 QTL

242 The QTL for PLACL and pycnidia density in cross 3D1x3D7 on Runal had a high LOD  
243 score, a low number of candidate genes within the 95% confidence interval, and  
244 explained approximately half of the observed phenotypic variance. Existing gene  
245 models were manually checked for accuracy, sequence polymorphisms between the two

246 parent isolates were analyzed and gene expression during the infection cycle was  
247 investigated. Population genomic approaches were used to investigate the genomic  
248 features of the region in a natural population.

249

#### 250 Re-annotation of the genes in the chromosome 7 QTL

251 Within the 95% confidence interval, 25 of the 35 gene models from the reference  
252 annotation were not convincingly supported by RNAseq reads. The annotations of 20  
253 genes were replaced with those of Grandaubert et al. (2015). Four genes not present in  
254 any previous annotation were discovered and supported by our RNAseq data. The  
255 annotations of four additional genes were altered slightly from those of Grandaubert et  
256 al. (2015) or the JGI. After re-annotation, 38 genes were found in the 95% confidence  
257 interval (Table 3). Among the newly annotated genes, GO terms could be assigned to 17  
258 genes while the remaining 21 genes had no known function. Six genes within the QTL  
259 encode proteins with a predicted signal peptide but lack a trans-membrane domain and  
260 are therefore predicted to be secreted. Among these six genes, two meet the criteria for  
261 being small secreted effector-like proteins (<300 amino acids, secreted and cysteine  
262 rich).

263

#### 264 Identification of high priority candidate genes within the chromosome 7 QTL

265 Sequence variation within gene coding regions of the chromosome 7 QTL was  
266 investigated in the parental genomes. 82 sequence variants were identified, comprising  
267 51 synonymous and 31 non-synonymous mutations as well as 4 insertions/deletions  
268 (indels). 17 genes were found to have at least one mutation affecting amino acid  
269 sequence. 19 genes showed differential expression *in planta* between the two parental  
270 isolates for at least one time point during the infection process. Several high-priority

271 candidate genes were identified based on putative function, sequence variation and  
272 expression levels during infection. Candidate gene *Zt\_QTL7\_5* is not present in any  
273 existing annotation and BLAST searches showed no similarities to other proteins. With  
274 a length of 65 aa, six cysteine residues and a signal peptide domain, it fulfills the criteria  
275 of a typical small secreted effector protein. Its peak expression is between 12 and 14  
276 dpi, during the transition from symptomless growth to the onset of chlorosis (Figure 4).  
277 It is the second most expressed gene in the QTL confidence interval, but shows  
278 significantly lower expression in 3D7 (the more virulent parent) at 14 dpi.  
279 Candidate gene 00558 is also a small secreted protein containing an *Alternaria*  
280 *alternata* allergen domain. This domain is unique to the Dothideomycete and  
281 Sordariomycete classes of fungi (Chruszcz et al, 2012) and can induce major allergic  
282 reactions in the human respiratory systems (Bush et al, 2001). This gene shows peak  
283 expression during the symptomless phase and lower expression in 3D7 (Figure 4).  
284 Candidate gene 105313 is a fungal-specific transporter from the Major Facilitator  
285 Superfamily (MFS). It contains a trichothecene efflux domain that has been shown to  
286 play a role in toxin secretion in *Fusarium* (Alexander et al, 1999). The parental alleles  
287 differed by two non-synonymous SNPs. Candidate gene 00579 is a fungal-specific  
288 membrane protein containing 7 trans-membrane domains, a CFEM domain and a signal  
289 peptide. Expression peaks at 7 dpi (Figure 4).

290

#### 291 Population genomics of genes in the chromosome 7 QTL

292 As QTL mapping is highly cross specific, genetic variation in the chromosome 7 QTL was  
293 investigated in a natural population of 28 re-sequenced *Z. tritici* isolates from  
294 Switzerland. The 163 kb confidence interval contained an alternation of gene-rich and  
295 gene-poor regions. A large gene-poor region (found between ca. 1.79 - 1.84 Mb in the

296 reference genome assembly) contained only two genes (Figure 3E). This gene-poor  
297 region contained all transposable elements (TEs) found within the confidence interval  
298 (Figure 3D). Three classes of TEs were found in this region, including Copia, Gypsy and  
299 Tad1 elements. The gene-rich regions contained a higher density of SNPs than the  
300 average on the chromosome, reaching up to 120 SNPs per kb in some regions (Figure  
301 3C). The genotyping rate was high in the gene-rich region. The gene-poor and TE-rich  
302 regions contained few SNPs and had a low genotyping rate (Figure 3C) and generally  
303 had a lower GC content than the gene-rich regions (Figure 3B).

304

305 Genes within the confidence interval were highly variable for the number of SNPs  
306 within the natural population (Figure 3F). Seven genes contained fewer than 10 SNPs  
307 per kb whereas 9 genes contained more than 50 SNPs per kb. On average, the genes  
308 within the confidence interval contained 33 SNPs per kb. The Tajima's D statistic for 27  
309 genes having 10 or more SNPs showed an alternation of clusters of genes with positive  
310 D values and genes with negative D values (Figure 3G). Genes with negative D values are  
311 more likely to be under purifying selection while genes with positive D values are likely  
312 to be under balancing selection. This suggests variability in the selection processes  
313 acting on these genes, including a possibility of hitchhiking effects.

314

315

## 316 **Discussion**

317

318 Here we report the most comprehensive QTL mapping analysis of fungal virulence to  
319 date, utilizing different mapping populations and different host cultivars as well as  
320 measuring multiple traits associated with virulence. We were able to genetically dissect

321 pathogen virulence into separate components, showing that different components of  
322 virulence were under separate genetic control. QTLs were identified for all traits,  
323 including QTLs that were specific to mapping populations, cultivars and traits as well as  
324 QTLs that were shared among traits within the same mapping population. We identified  
325 genome regions associated with single large effects as well as regions of smaller  
326 additive effects.

327

### 328 The genetic architecture of virulence in *Z. tritici* is complex

329 Our results point to a complex genetic architecture involving multiple factors that  
330 combine to produce quantitative virulence. Strong evidence was found for transgressive  
331 segregation, with many progeny showing more extreme phenotypes than the parent  
332 isolates in both crosses. QTLs were specific to each cross and in some cases specific to a  
333 phenotype or cultivar. In all but one case, multiple traits mapped to the same QTL, an  
334 observation also made for other traits in *Z. tritici* (Lendenmann et al. 2014; 2015; 2016).

335

336 Both quantitative (Zhan et al, 2005) and large-effect interactions consistent with the  
337 gene-for-gene (GFG) hypothesis have been reported in *Z. tritici* (Brading et al, 2002,  
338 Kema et al, 2000). GFG interactions are frequently reported as conferring  
339 compatible/incompatible interactions (Flor, 1955). The large effect size of the 3D1x3D7  
340 chromosome 7 QTL on one of the cultivars shows similarity to a GFG interaction  
341 between a major resistance gene in Runal and a corresponding avirulence effector gene  
342 in the 3D1 strain of the pathogen. In our case the interaction explains ~50% of the  
343 overall variance for the virulence traits which also show a continuous distribution in the  
344 mapping population. These observations suggest that numerous additional genes of

345 small effect may also be involved, in addition to the genotype-by-environment  
346 interactions typically observed in quantitative phenotypes.

347

348 In contrast to the single large effect QTL in 3D1x3D7, numerous QTLs distributed across  
349 several chromosomes were found for the different phenotypes in cross 1A5x1E4. These  
350 QTLs had relatively small effects on phenotype and contained a high number of  
351 candidate genes. This suggests that the genetic architecture of virulence in 1A5x1E4 is  
352 more complex than that of 3D1x3D7 and demonstrates the contribution of both large  
353 and small effects on virulence.

354

#### 355 Additive effects of QTL loci on virulence

356 The multiple factor hypothesis (Morgan et al 1915) based on additive effects of many  
357 genes is the key principle underlying quantitative traits. Recombination generates  
358 progeny with different combinations of genes than the parents and can contribute to  
359 novel virulence phenotypes (Joseph et al, 2011, Kanvil et al, 2015). Strong additive  
360 effects were observed in cross 1A5x1E4 for the QTL for pycnidia density. For both  
361 cultivars, alternative alleles from the two parents combined to produce a higher  
362 phenotype. Isolates with the same parental allele at both QTLs showed lower virulence  
363 than isolates with the different parental alleles at the two QTLs. Transgressive  
364 segregation was observed for all phenotypes in both crosses. These findings illustrate  
365 the power of recombination to generate progeny phenotypes that are significantly  
366 different from their parents, an observation shared with other plant pathogenic fungi  
367 (Sommerhalder et al, 2010; Stefansson et al. 2014) and show how a range of  
368 quantitative virulence phenotypes can be generated through sexual reproduction in  
369 natural field populations.

370

371 The contribution of accessory chromosomes to virulence

372 By using the novel approach of associating virulence phenotypes with the presence or  
373 absence of specific accessory chromosomes, we discovered a significant correlation for  
374 some phenotypes, with higher virulence observed in offspring carrying certain  
375 accessory chromosomes. Accessory chromosomes were shown to play an important  
376 role in virulence in other fungal pathogens (Akagi et al, 2009, Ma et al, 2010, Miao, et al,  
377 1991) but until now their role in *Z. tritici* was elusive (Stukenbrock et al, 2010). The  
378 increase in virulence was small, around 2-3%, but significant. If this correlation also  
379 exists under natural field conditions, this increase in virulence and the associated  
380 increase in reproduction would represent a significant fitness advantage that could  
381 explain why accessory chromosomes are retained in natural field populations.

382

383 Cultivar specificity

384 Cultivar specificity is well documented in *Z. tritici* (Ahmed et al, 1995, Cowger and  
385 Mundt 2002, Zhan et al, 2002) and is commonly reported as qualitative  
386 compatible/incompatible interactions (e.g. Brading et al, 2002) or as generally  
387 quantitative with isolates being more virulent or less virulent on a particular host (e.g.  
388 Zhan et al, 2005). In cross 3D1x3D7, all phenotypes were higher on the more  
389 susceptible cultivar as expected. However, in cross 1A5x1E4, PLACL was higher in  
390 Runal whereas pycnidia size, density and melanization were higher in Titlis, the more  
391 resistant cultivar. Additionally, in 1A5x1E4 the same chromosome 5 QTL was found for  
392 pycnidia density in both cultivars. However, a second QTL was found on chromosome 3  
393 in Runal and on chromosome 9 in Titlis, suggesting that these QTL loci play a role in  
394 quantitative specialization to these two cultivars. This is in contrast to the findings of



395 Mirzadi Gohari et al, (2015) who found a QTL at a similar position on chromosome 5  
396 that was implicated in host specificity in a different set of cultivars. The results from the  
397 accessory chromosome presence/absence analysis also point towards cultivar  
398 specificity, with different accessory chromosomes affecting the same phenotype on  
399 different cultivars.

400

#### 401 Contribution of pycnidia number and size to epidemic potential

402 The basic reproductive number ( $R_0$ ) is the theoretical number of infections arising from  
403 a single infection event and can be useful in predicting the potential development of  
404 plant disease epidemics (van den Bosch et al, 2008). Pycnidia represent the asexual  
405 reproductive output of a *Z. tritici* strain, with larger pycnidia correlated with a greater  
406 number of conidia in earlier work (Gough, 1978). It was previously postulated that the  
407 number and size of pycnidia could be important measures of virulence in *Z. tritici*  
408 (Stewart and McDonald 2014, Suffert et al, 2013). Our results show a significant  
409 correlation indicating that larger pycnidia bear both larger and more numerous spores.

410

411 The number and size of pycnidia influence the  $R_0$  and therefore provide a prediction of  
412 the epidemic potential associated with a pathogen strain under field conditions. In  
413 contrast, measuring the leaf area covered by lesions (PLACL) gives an indication of the  
414 amount of damage caused by a pathogen strain on the host plant. The ability to directly  
415 measure both the epidemic potential of an isolate and the amount of damage it causes to  
416 its host represents a powerful improvement in the overall measurement of pathogen  
417 virulence that can also be used to improve measurements of resistance in the host  
418 (Stewart et al. 2016). Furthermore, the identification of a QTL for pycnidia size shows  
419 that this important trait can be under separate genetic control. A separate experiment

420 oriented around measuring differences in host resistance and conducted using naturally  
421 infected plants under field conditions showed that host genotype could affect pycnidia  
422 formation independently of damage caused by leaf lesions (Stewart et al 2016).  
423 Theoretically, a pathogen strain which causes high levels of leaf necrosis but has a low  
424  $R_0$  (i.e. producing fewer pycnidia per infected leaf) may appear more damaging at a  
425 small spatial scale but an isolate which has a higher  $R_0$  (i.e. producing more pycnidia per  
426 infected leaf) has a greater potential to cause damage over larger spatial scales. From an  
427 epidemiology perspective, directly measuring pathogen reproduction on a given host  
428 could inform disease management decisions oriented around inhibiting pathogen  
429 reproduction (e.g. through seeking resistance genes that lower pathogen reproduction  
430 in addition to resistance genes that lower host damage), as well as providing a novel  
431 way of selecting for quantitative host resistance. The results from cross 1A5x1E4  
432 illustrate the potential usefulness of this approach with different levels of pycnidia and  
433 PLACL found on the two different cultivars.

434

#### 435 Candidate genes affecting pathogen virulence

436 By combining several disciplines, we were able to narrow the candidate gene list for the  
437 chromosome 7 QTL affecting PLACL, pycnidia density and melanization, but it remains  
438 possible that different genes located within this QTL interact to affect all three traits. It  
439 also is possible that one gene in this QTL is primarily responsible for only one  
440 phenotype, which influences the other two without any genetic or regulatory  
441 connection, a situation referred to as spurious, vertical, relational or reactive pleiotropy  
442 (Paaby and Rockman, 2013). For example, it is plausible that a gene encoding higher  
443 PLACL would lead to greater pycnidia density that could in turn affect pycnidia  
444 melanization. The results from cross 1A5x1E4 offer support for the latter hypothesis,

445 with multiple traits mapping to the same QTL on chromosome 5, though independent  
446 QTLs were found on different chromosomes for the same traits. In previous work, genes  
447 up-regulated in the biotrophic phase of the infection cycle showed reduced pycnidia  
448 production in knockout mutants (Poppe et al, 2015), providing evidence that pycnidia  
449 development is somewhat dependent on prior processes.

450

451 Among the candidate genes within the chromosome 7 QTL, the one we consider most  
452 likely to explain the observed virulence is *Zt\_QTL7\_5*, a previously un-described small  
453 secreted protein (SSP) that is highly expressed during the switch to necrotrophic  
454 growth. SSPs are common virulence factors in fungi that facilitate infection or elicit a  
455 response in the host (Lo Presti, 2015). SSPs often conform to the GFG paradigm by  
456 interacting with a major R gene in the host. A GFG interaction would explain the large  
457 effect of the chromosome 7 QTL on only one host. Interestingly, no significant sequence  
458 differences exist for this gene between the parent isolates, but the expression levels are  
459 significantly lower in 3D7, the more virulent parent. This is consistent with the theory  
460 of effector triggered immunity (ETI), where recognition of a pathogen effector triggers a  
461 defense response in the host. Another SSP, candidate gene 00558, contains a conserved  
462 domain known to elicit allergic response in humans (Bush et al, 2001). It has  
463 additionally been implicated in virulence in *Alternaria brassicicola* on *Arabidopsis*  
464 (Cramer and Lawrence, 2004) and inhibits plant antimicrobial proteins (Gomez-Casado  
465 et al, 2014). Given the existing knowledge of this protein, it appears that it could play a  
466 role in *Z. tritici* virulence. An MFS transporter implicated in toxin secretion was also  
467 located in the QTL. MFS transporters contribute to virulence by secretion of fungal  
468 toxins and secondary metabolites as well as efflux of plant-derived antimicrobial  
469 compounds (Coleman and Mylonakis, 2009). Candidate gene 00579 contains a CFEM

470 domain that is unique to fungi and found at significantly higher frequency in pathogenic  
471 than non-pathogenic fungi (Zhang et al, 2015). Putative functions of the CFEM domain  
472 include cell surface receptors, signal transduction or adhesion of molecules in plant-  
473 pathogen interactions (Kulkarni et al, 2003). None of the genes previously described as  
474 having a role in virulence in *Z. tritici* were identified in this study, highlighting the  
475 usefulness of forward genetic approaches such as QTL mapping to identify novel  
476 virulence genes.

477

#### 478 Population genomics of the chromosome 7 QTL

479 Analysis of the large effect QTL on chromosome 7 in a Swiss field population revealed  
480 several interesting genomic features. The region was highly variable, with genes  
481 exhibiting variable numbers of SNPs as well as evidence for both purifying and  
482 balancing selection. Genes involved in virulence are often under positive selection in  
483 plant pathogens (Lo Presti et al, 2015; Stukenbrock and McDonald, 2009), including in  
484 *Z. tritici* (Poppe et al, 2015). An island of transposable elements (TEs) was found within  
485 a gene-poor region of the QTL. The *Z. tritici* genome contains 16.7% repetitive elements  
486 (Dhillon et al, 2014). Effector genes show a tendency to cluster in gene-poor regions of  
487 repetitive DNA that are TE-rich in numerous filamentous fungal plant pathogens (Dong  
488 et al, 2015). TEs can influence the expression of effector genes by insertion into  
489 promoter regions (Ali et al 2014) or through epigenetic gene silencing (Shaaban et el,  
490 2010). We hypothesize that these processes may explain the differences in expression  
491 observed in *Zt\_QTL7\_5*.

492

#### 493 Conclusions

494 This study highlights the complex nature of virulence in the wheat-*Z. tritici*  
495 pathosystem, illustrating that many factors contribute to quantitative phenotypes. We  
496 showed that virulence is comprised of different traits, some affecting host damage and  
497 others affecting pathogen reproduction, that can be under independent genetic control.  
498 In light of this, researchers and breeders should reconsider the best way to measure  
499 virulence in this pathosystem. We propose that more attention should be focused on  
500 resistance that reduces pathogen reproduction in order to decrease  $R_0$  during  
501 epidemics.

502

### 503 **Experimental Procedures**

504

505 Two *Z. tritici* mapping populations (described in Lendenmann et al, 2014) were  
506 phenotyped in a greenhouse-based seedling assay as described in Stewart and  
507 McDonald (2014). The Swiss winter wheat cultivars 'Runal' and 'Titlis' (DSP Ltd, Delly,  
508 Switzerland) were inoculated using each offspring from both crosses along with the  
509 parental isolates. Two plants of each cultivar were inoculated with each *Z. tritici* isolate  
510 to give two technical replicates. Each technical replicate was placed in a separate  
511 greenhouse compartment. This process was repeated three times over three  
512 consecutive weeks to generate three biological replicates, resulting in six replicates  
513 total for each isolate-cultivar combination.

514

515 At 23 days post inoculation (dpi) the second leaf from each plant was excised,  
516 photographed and phenotyped using automated image analysis as described previously  
517 (Stewart and McDonald 2014). The method was modified slightly to include a measure  
518 of pycnidia melanization. RGB images were converted to 8-bit greyscale and the mean

519 grey value for the pixels making up each pycnidium was calculated. The grey scale runs  
520 from 0 (black) to 255 (white). Grey values can be used as a proxy for the degree of  
521 melanisation (Lendenmann et al, 2015). The phenotypes percent leaf area covered by  
522 lesions (PLACL), pycnidia density (pycnidia per cm<sup>2</sup> leaf area), pycnidia size (in mm<sup>2</sup>)  
523 and pycnidia melanization were used as phenotypes for QTL mapping (see below).

524

525 For the 3D1x3D7 progeny, the mean pycnidia size was calculated for each isolate on  
526 Runal. The 10 isolates showing the largest mean pycnidia sizes and 10 showing the  
527 smallest mean pycnidia sizes were selected for further analysis. The leaves from the six  
528 replicates for each isolate were retrieved from storage. Each leaf was cut into ~30 mm  
529 long sections. All sections from each leaf were placed into a 1.2 ml collection microtube  
530 (QIAGEN) along with a 5 mm x 25 mm strip of filter paper. 100 µl sterile water was  
531 added to each tube to moisten the filter paper. Tubes were capped and placed at 25 °C  
532 for 24 h to provide the humid environment needed to exude the cirrhi containing spores  
533 from pycnidia. 800 µl of water containing 0.001% TWEEN 20 was added to each tube.  
534 Tubes were vortexed for 20 seconds to suspend the released spores. 100 µl of the spore  
535 solution was placed into a black glass-bottomed 96 well plate (Greiner bio one, µClear).  
536 Spores were imaged with an Olympus IX 81 inverted microscope coupled with a  
537 Hamamatsu ORCA-ER camera using transmission illumination. Four images were made  
538 from each well at 20x magnification with a 10% overlap between images. Images from  
539 each well were stitched together using ImageJ (Rasband, 1997–2015). Each spore was  
540 counted and its length was measured using the line selection tool and the measure  
541 command in ImageJ (Figure S2). The mean spore length was used as a proxy for spore  
542 size. The total number of spores per leaf was calculated (Figure S2) and divided by the  
543 number of pycnidia per leaf to derive the mean number of spores per pycnidium.

544

545 All analyses were performed in base R (R core team, 2012) unless specified otherwise.  
546 To normalize environmental variation between technical replicates and biological  
547 replicates and account for genotype-by-environment (GxE) interactions, phenotypes  
548 were mean centered (Schielzeth, 2010). For each phenotype, the mean value for each  
549 greenhouse chamber and time point was calculated. This value was subtracted from all  
550 individual values from the corresponding greenhouse chamber and time point, resulting  
551 in a mean value of  $\sim 0$  for each greenhouse chamber time point. The mean of these  
552 transformed values was calculated for each progeny and used for subsequent analyses.  
553 PLACL and pycnidia density values were log transformed prior to mean centering. Mean  
554 centered values were used for analysis but untransformed values are reported in the  
555 text and figures for clarity.

556

557 Phenotype differences between wheat cultivars were calculated using ANOVA. Effects  
558 on phenotypes of accessory chromosome presence or absence were calculated using  
559 ANOVA with the presence or absence of each chromosome as factors. Non-significant  
560 factors were removed from the models. Effect sizes ( $\eta^2$ ) were calculated using the lsr  
561 package (Navarro, 2015). Fisher's LSD test was used to calculate the differences  
562 between isolates with different parental alleles at QTL peaks using the Agricolae  
563 package (de Mendiburu, 2014). Correlations between pycnidia size and spore size and  
564 between pycnidia size and number of spores per pycnidia were made with Pearson's  
565 correlation coefficient.

566

567 Progeny from both crosses were genotyped using restriction site associated DNA  
568 sequencing (RADseq) based on a method adapted from Etter et al (2011) as described

569 previously (Lendenmann et al, 2014). The genetic map of Lendenmann et al (2014) was  
570 used to perform QTL mapping. QTL mapping was performed using the r/QTL package  
571 (Arends et al, 2010) following the methods described in Lendenmann et al (2014).

572

573 To establish the presence or absence of accessory chromosomes in 3D1x3D7, sequence  
574 reads from the RADseq genotyping were aligned to the IPO323 reference genome  
575 (Goodwin et al, 2011). For each isolate, the mean read depth was calculated for each  
576 chromosome and divided by the mean sequence depth over all chromosomes. Thus,  
577 chromosomes with read depth similar to the genome average have a value of  $\sim 1$  and  
578 were deemed present whereas chromosomes with low or no read depth have a value of  
579  $\sim 0$  and were deemed absent. Deviations from Mendelian inheritance among the  
580 accessory chromosomes exhibiting presence/absence polymorphisms in the parents  
581 were tested using a Chi square ( $\chi^2$ ) test.

582

583 Parent genome sequences (Croll et al, 2013) were aligned to the IPO323 reference  
584 genome. Sequence variants were identified using the unified genotyper within GATK  
585 (McKenna et al, 2010) and effects of variants found within genes were predicted using  
586 snpEFF (Cingolani et al, 2012a) and snpSIFT (Cingolani et al, 2012b) following the  
587 methods outlined in Lendenmann et al (2014).

588

589 The genes within the 95% confidence interval containing a QTL with large effect on  
590 chromosome 7 were manually re-annotated using existing annotations from the IPO323  
591 reference annotation (Goodwin et al, 2011) and Grandaubert et al. (2015) along with  
592 RNAseq data from IPO323 (Rudd et al, 2015) and from the 3D7 parent isolate (Palma-  
593 Guerrero et al, 2016). Genes were annotated using blast2go (Conesa et al. 2005). Signal



594 peptides were identified using signalP 4.1 (Petersen et al, 2011) and trans-membrane  
595 domains were identified with TMHMM 2.0 (Krogh et al, 2001). The re-annotated genes  
596 were used for all subsequent analyses of this region.

597

598 An *in planta* infection assay was performed with the parent isolates 3D1 and 3D7  
599 (Javier Palma-Guerrero, unpublished). RNA was sequenced from leaf samples collected  
600 at 7, 12, 14 and 28 days post inoculation (dpi) as described earlier (Palma-Guerrero et  
601 al. 2016).

602

603 The population genomics of the genes in the 95% confidence interval of the  
604 chromosome 7 QTL was characterized using 28 re-sequenced *Z. tritici* isolates sampled  
605 from a single field in Switzerland. Sequences were aligned to the reference genome  
606 using Bowtie 2 version 2.2.3 (Langmead and Salzberg, 2012). SNPs among the isolates  
607 were identified using GATK tools (De Pristo et al. 2011). GC content was calculated in  
608 the reference genome using 1000 bp overlapping windows, with 100 bp overlaps. The  
609 locations of transposable elements within the reference genome were identified using  
610 RepeatMasker (Smit et al. 2013-2015). The repeat library used for annotation was  
611 version 20150807 downloaded from Repbase in September 2015 (Jurka et al. 2005).  
612 The SNP genotyping rate in the 28 re-sequenced isolates was calculated in windows of  
613 1000 bp. The SNP density was calculated in windows of 500 bp for SNPs that were  
614 genotyped in >50% of the re-sequenced isolates. The SNP density per coding sequence  
615 was calculated by dividing the number of SNPs with a genotyping rate > 90% by the  
616 total coding sequence length. Tajima's D statistic (Tajima, 1989) was calculated per  
617 gene using Popgenome in R (Pfeifer, et al, 2014). Only SNPs with a genotyping rate >

618 90% were included. Tajima's D values for genes with less than 10 SNPs were not  
619 calculated.

620

## 621 **Acknowledgements**

622

623 The research was supported by a grant from the Swiss National Science Foundation  
624 (31003A\_134755). RADseq libraries were prepared at the Genetic Diversity Center  
625 Zürich (GDC) and sequenced at the Quantitative Genomics Facility at the Department of  
626 Biosystems Science and Engineering (D-BSSE) at the scientific central facilities of ETH  
627 Zürich. Microscopy was carried out at the Scientific Center for Optical and Electron  
628 Microscopy (ScopeM) of the ETH Zürich. Technical assistance was provided by Renato  
629 Guidon, Thomas Kreienbühl and Leandra Knecht. Cross 3D1x3D7 was made by M.  
630 Lendenmann. Cross 1A5x1E4 was made by Marcello Zala.

631

632

633 **References**

634

635 **Ahmed, H. U., Mundt, C. C. and Coakley, S. M.** (1995) Host-pathogen relationship of  
636 geographically diverse isolates of *Septoria tritici* and wheat cultivars. *Plant Pathol.* **44**,  
637 838-847.

638

639 **Ali, S., Laurie, J. D., Linning, R., Cervantes-Chavez, J. A., Gaudet, D. and Bakkeren, G.**  
640 (2014) An Immunity-Triggering Effector from the Barley Smut Fungus *Ustilago hordei*  
641 Resides in an Ustilaginaceae-Specific Cluster Bearing Signs of Transposable Element-  
642 Assisted Evolution. *PLoS Pathog.* **10**, e1004223.

643

644 **Akagi, Y., Akamatsu, H., Otani, H. and Kodama, M.** (2009) Horizontal Chromosome  
645 Transfer, a Mechanism for the Evolution and Differentiation of a Plant-Pathogenic  
646 Fungus. *Eukaryotic Cell.* **8**, 1732-1738.

647

648 **Alexander, J. N., McCormick, P. S. and Hohn, M. T.** (1999) TRI12, a trichothecene  
649 efflux pump from *Fusarium sporotrichioides*: gene isolation and expression in yeast. *Mol.*  
650 *Genet. Genomics.* **261**, 977-984.

651

652 **Almasy, L. and Blangero, J.** (2009) Human QTL Linkage Mapping. *Genetica.* **136**, 333-  
653 340.

654

655 **Alonso-Blanco, C. and Méndez-Vigo, B.** (2014) Genetic architecture of naturally  
656 occurring quantitative traits in plants: an updated synthesis. *Curr. Opin. Plant Biol.* **18**,  
657 37-43.

658

659 **Arends, D., Prins, P., Jansen, R. C. and Broman, K. W.** (2010) R/qlt: high-throughput  
660 multiple QTL mapping. *Bioinformatics*. **26**, 2990-2992.

661

662 **Bock, C. H., Parker, P. E., Cook, A. Z. and Gottwald, T. R.** (2008) Visual Rating and the  
663 Use of Image Analysis for Assessing Different Symptoms of Citrus Canker on Grapefruit  
664 Leaves. *Plant Dis.* **92**, 530-541.

665

666 **van den Bosch, F., McRoberts, N., van den Berg, F. and Madden, L. V.** (2008) The  
667 Basic Reproduction Number of Plant Pathogens: Matrix Approaches to Complex  
668 Dynamics. *Phytopathology*. **98**, 239-249.

669

670 **Bourras, S., McNally, K. E., Ben-David, R., Parlange, F., Roffler, S., Praz, C. R.,**  
671 **Oberhaensli, S., Menardo, F., Stirnweis, D., Frenkel, Z., Schaefer, L. K., Flückiger, S.,**  
672 **Treier, G., Herren, G., Korol, A. B., Wicker, T. and Keller, B.** (2015) Multiple  
673 Avirulence Loci and Allele-Specific Effector Recognition Control the Pm3 Race-Specific  
674 Resistance of Wheat to Powdery Mildew. *The Plant Cell*. **10**, 2991-3012

675

676 **Brading, P. A., Verstappen, E.C.P., Kema, G.H.J., Brown, J.K.M.** (2002) A gene-for-gene  
677 relationship between wheat and *Mycosphaerella graminicola*, the Septoria tritici blotch  
678 pathogen. *Phytopathology*. **92**, 439-445.

679

680 **Brown, J. K. M., Chartrain, L., Lasserre-Zuber, P. and Saintenac, C.** (2015) Genetics of  
681 resistance to *Zymoseptoria tritici* and applications to wheat breeding. *Fungal Genet. Biol.*  
682 **79**, 33-41.

683

684 **Bruns, E., Carson, M. L. and May, G.** (2014) The Jack of all trades is master of none: A  
685 pathogen's ability to infect a great number of host genotypes comes at a cost of delayed  
686 reproduction. *Evolution*. **68**, 2453-2466.

687

688 **Bush, R. K. and Portnoy, J. M.** (2001) The role and abatement of fungal allergens in  
689 allergic diseases. *J. Allergy Clin. Immunol.* **107**, S430-S440.

690

691 **Cowger, C., Hoffer, M. E. and Mundt, C. C.** (2000) Specific adaptation by  
692 *Mycosphaerella graminicola* to a resistant wheat cultivar. *Plant Pathol.* **49**, 445-451.

693

694 **Cramer, R. A. and Lawrence, C. B.** (2004) Identification of *Alternaria brassicicola* genes  
695 expressed *in planta* during pathogenesis of *Arabidopsis thaliana*. *Fungal Genet. Biol.* **41**,  
696 115-128.

697

698 **Chruszcz, M., Chapman, M. D., Osinski, T., Solberg, R., Demas, M., Porebski, P. J.,**  
699 **Majorek, K. A., Pomés, A. and Minor, W.** (2012) *Alternaria alternata* allergen, Alt a 1 -  
700 a unique,  $\beta$ -barrel protein dimer exclusively found in fungi. *J. Allergy Clin. Immunol.* **130**,  
701 241-247.e249.

702

703 **Cingolani, P., Platts, A., Wang, L. L., Coon, M., Nguyen, T., Wang, L., Land, S. J., Lu, X.**  
704 **and Ruden, D. M.** (2012a) A program for annotating and predicting the effects of single  
705 nucleotide polymorphisms, SnpEff: SNPs in the genome of *Drosophila melanogaster*  
706 strain w(1118); iso-2; iso-3. *Fly.* **6**, 80-92.

707

- 708 **Cingolani, P., Patel, V. M., Coon, M., Nguyen, T., Land, S. J., Ruden, D. M. and Lu, X.**  
709 (2012b) Using *Drosophila melanogaster* as a Model for Genotoxic Chemical Mutational  
710 Studies with a New Program, SnpSift. *Front. Genet.* **3**, 35.  
711
- 712 **Cohen, L. and Eyal, Z.** (1993) The histology of processes associated with the infection  
713 of resistant and susceptible wheat cultivars with *Septoria tritici*. *Plant Pathol.* **42**, 737-  
714 743.  
715
- 716 **Conesa, A., Götz, S., García-Gómez, J. M., Terol, J., Talón, M. and Robles, M.** (2005)  
717 Blast2GO: a universal tool for annotation, visualization and analysis in functional  
718 genomics research. *Bioinformatics.* **21**, 3674-3676.  
719
- 720 **Cools, H. J., Mullins, J. G. L., Fraaije, B. A., Parker, J. E., Kelly, D. E., Lucas, J. A. and**  
721 **Kelly, S. L.** (2011) Impact of Recently Emerged Sterol 14 $\alpha$ -Demethylase (*CYP51*)  
722 Variants of *Mycosphaerella graminicola* on Azole Fungicide Sensitivity. *Appl. Environ.*  
723 *Microbiol.* **77**, 3830-3837.  
724
- 725 **Courvoisier, N., Häner, L. L., Bertossa, M., Thévoz, E., Anders, M., Stoll, P., Weisflog,**  
726 **P., Dugon, J. and Grünig, K.** (2015) Liste recommandée des variétés de céréales pour la  
727 récolte 2016 Recherche Agronomique Suisse. [http://www.swissgranum.ch/88-2-Listes-](http://www.swissgranum.ch/88-2-Listes-recommandes.html)  
728 [recommandes.html](http://www.swissgranum.ch/88-2-Listes-recommandes.html).  
729
- 730 **Croll, D., Zala, M., and McDonald, B. A.** (2013) Breakage-fusion-bridge Cycles and  
731 Large Insertions Contribute to the Rapid Evolution of Accessory Chromosomes in a  
732 Fungal Pathogen. *PLoS Genet.* **9**(6), e1003567–20.

733

734 **Croll, D., Lendenmann, M. H., Stewart, E. and McDonald, B. A.** (2015) The Impact of  
735 Recombination Hotspots on Genome Evolution of a Fungal Plant Pathogen. *Genetics*.  
736 **201**(3): 1213-1228.

737

738 **Cumagun, C. J. R., Bowden, R. L., Jurgenson, J. E., Leslie, J. F. and Miedaner, T.** (2004)  
739 Genetic Mapping of Pathogenicity and Aggressiveness of *Gibberella zeae* (*Fusarium*  
740 *graminearum*) Toward Wheat. *Phytopathology*. **94**, 520-526.

741

742 **Dean, R., Van Kan, J. A. L., Pretorius, Z. A., Hammond-Kosack, K. E., Di Pietro, A.,**  
743 **Spanu, P. D., Rudd, J. J., Dickman, M., Kahmann, R., Ellis, J. and Foster, G. D.** (2012)  
744 The Top 10 fungal pathogens in molecular plant pathology. *Mol. Plant Pathol.* **13**, 413-  
745 430.

746

747 **DePristo, M. A., Banks, E., Poplin, R., Garimella, K. V., Maguire, J. R., Hartl, C.,**  
748 **Philippakis, A. A., del Angel, G., Rivas, M. A., Hanna, M., McKenna, A., Fennell, T. J.,**  
749 **Kernytsky, A. M., Sivachenko, A. Y., Cibulskis, K., Gabriel, S. B., Altshuler, D. and**  
750 **Daly, M. J.** (2011) A framework for variation discovery and genotyping using next-  
751 generation DNA sequencing data. *Nat Genet.* **43**, 491-498.

752

753 **Dhillon, B., Gill, N., Hamelin, R. C. and Goodwin, S. B.** (2014) The landscape of  
754 transposable elements in the finished genome of the fungal wheat pathogen  
755 *Mycosphaerella graminicola*. *BMC Genomics*. **15**, 1-17.

756

- 757 **Dong, S., Raffaele, S. and Kamoun, S.** (2015) The two-speed genomes of filamentous  
758 pathogens: waltz with plants. *Curr. Opin. Genet. Dev.* **35**, 57-65.  
759
- 760 **Etter, P. D., Bassham, S., Hohenlohe, P. A., Johnson, E. A. and Cresko, W. A.** (2011)  
761 SNP Discovery and Genotyping for Evolutionary Genetics Using RAD Sequencing. In  
762 *Molecular Methods for Evolutionary Genetics* (ed. by V. Orgogozo & V. M. Rockman), pp.  
763 157-178. Humana Press, Totowa, NJ.  
764
- 765 **Eyal, Z., Scharen, A.L., Prescott, J.M., van Ginkel, M.** (1987) The Septoria Diseases of  
766 Wheat. *CYMMIT*.  
767
- 768 **Flor, H. H.** (1955) Host-parasite interaction in flax rust-its genetics and other  
769 implications. *Phytopathology.* **45**:680-85.  
770
- 771 **Fones, H. and Gurr, S.** (2015) The impact of Septoria tritici Blotch disease on wheat: An  
772 EU perspective. *Fungal Genet. Biol.* **79**, 3-7.  
773
- 774 **Foulongne-Oriol, M.** (2012) Genetic linkage mapping in fungi: current state,  
775 applications, and future trends. *Appl. Microbiol. Biotechnol.* **95**, 891-904.  
776
- 777 **Friesen, T. L. and Faris, J. D.** (2010) Characterization of the wheat-*Stagonospora*  
778 *nodorum* disease system: what is the molecular basis of this quantitative necrotrophic  
779 disease interaction? *Can. J. Plant Pathol.* **32**, 20-28.  
780



- 781 **Furbank, R. T. and Tester, M.** (2011) Phenomics – technologies to relieve the  
782 phenotyping bottleneck. *Trends Plant Sci.* **16**, 635-644.  
783
- 784 **Gómez-Casado, C., Murua-García, A., Garrido-Arandia, M., González-Melendi, P.,**  
785 **Sánchez-Monge, R., Barber, D., Pacios, L. F. and Díaz-Perales, A.** (2014) Alt a 1 from  
786 *Alternaria* interacts with PR5 thaumatin-like proteins. *FEBS Lett.* **588**, 1501-1508.  
787
- 788 **Goodwin, S. B., M'Barek S, B., Dhillon, B., Wittenberg, A. H., Crane, C. F., Hane, J. K.,**  
789 **Foster, A. J., Van der Lee, T. A., Grimwood, J., Aerts, A., Antoniw, J., Bailey, A.,**  
790 **Bluhm, B., Bowler, J., Bristow, J., van der Burgt, A., Canto-Canche, B., Churchill, A.**  
791 **C., Conde-Ferraez, L., Cools, H. J., Coutinho, P. M., Csukai, M., Dehal, P., De Wit, P.,**  
792 **Donzelli, B., van de Geest, H. C., van Ham, R. C., Hammond-Kosack, K. E., Henrissat,**  
793 **B., Kilian, A., Kobayashi, A. K., Koopmann, E., Kourmpetis, Y., Kuzniar, A.,**  
794 **Lindquist, E., Lombard, V., Maliepaard, C., Martins, N., Mehrabi, R., Nap, J. P.,**  
795 **Ponomarenko, A., Rudd, J. J., Salamov, A., Schmutz, J., Schouten, H. J., Shapiro, H.,**  
796 **Stergiopoulos, I., Torriani, S. F., Tu, H., de Vries, R. P., Waalwijk, C., Ware, S. B.,**  
797 **Wiebenga, A., Zwiers, L. H., Oliver, R. P., Grigoriev, I. V. and Kema, G. H.** (2011)  
798 Finished genome of the fungal wheat pathogen *Mycosphaerella graminicola* reveals  
799 dispensome structure, chromosome plasticity, and stealth pathogenesis. *PLoS Genet.* **7**,  
800 e1002070.  
801
- 802 **Gough, F. J.** (1978) Effect of Wheat Host Cultivars on Pycnidiospore Production by  
803 *Septoria tritici*. *Phytopathology.* **68**, 1343-1345.  
804

- 805 **Grandaubert, J., Bhattacharyya, A. and Stukenbrock, E. H.** (2015) RNA-seq Based  
806 Gene Annotation and Comparative Genomics of Four Fungal Grass Pathogens in the  
807 Genus *Zymoseptoria* Identify Novel Orphan Genes and Species-Specific Invasions of  
808 Transposable Elements. *G3*. **5**(7):1323-1333.
- 809
- 810 **Habgood, R. M.** (1977) Resistance of barley cultivars to *Rhynchosporium secalis*. *Trans.*  
811 *Br. Mycol. Soc.* **69**, 281-286.
- 812
- 813 **Halama, P., Skajennikoff, M. and Dehorter, B.** (1999) Tetrad analysis of mating type,  
814 mutations, esterase and aggressiveness in *Phaeosphaeria nodorum*. *Mycol. Res.* **103**, 43-  
815 49.
- 816
- 817 **Hansen, T. F.** (2006) The Evolution of Genetic Architecture. *Annu. Rev. Ecol. Evol. Syst.*  
818 **37**, 123-157.
- 819
- 820 **Jørgensen, L. N., Hovmøller, M. S., Hansen, J. G., Lassen, P., Clark, B., Bayles, R.,**  
821 **Rodemann, B., Flath, K., Jahn, M., Goral, T., Jerzy Czembor, J., Cheyron, P.,**  
822 **Maumene, C., De Pope, C., Ban, R., Nielsen, G. C. and Berg, G.** (2014) IPM Strategies  
823 and Their Dilemmas Including an Introduction to [www.eurowheat.org](http://www.eurowheat.org). *J. Integr. Agric.*  
824 **13**, 265-281.
- 825
- 826 **Joseph, B., Schwarz, R. F., Linke, B., Blom, J., Becker, A., Claus, H., Goesmann, A.,**  
827 **Frosch, M., Müller, T., Vogel, U. and Schoen, C.** (2011) Virulence Evolution of the  
828 Human Pathogen *Neisseria meningitidis* by Recombination in the Core and Accessory  
829 Genome. *PLoS ONE*. **6**, e18441.

830

831 **Jurka, J., Kapitonov, V. V., Pavlicek, A., Klonowski, P., Kohany, O. and Walichiewicz,**

832 **J.** (2005) Repbase Update, a database of eukaryotic repetitive elements. *Cytogenet.*

833 *Genome Res.* **110**, 462-467.

834

835 **Kanvil, S., Collins, C. M., Powell, G. and Turnbull, C. G. N.** (2015) Cryptic Virulence

836 and Avirulence Alleles Revealed by Controlled Sexual Recombination in Pea Aphids.

837 *Genetics.* **199**, 581-593.

838

839 **Kema, J. G. H., Verstappen, P. E. C., Todorova, M. and Waalwijk, C.** (1996) Successful

840 crosses and molecular tetrad and progeny analyses demonstrate heterothallism in

841 *Mycosphaerella graminicola*. *Curr. Genet.* **30**, 251-258.

842

843 **Kema, G. H. J., Verstappen, E. C. P. and Waalwijk, C.** (2000) Avirulence in the Wheat

844 *Septoria tritici* Leaf Blotch Fungus *Mycosphaerella graminicola* Is Controlled by a Single

845 Locus. *Mol. Plant Microbe Interact.* **13**, 1375-1379.

846

847 **Kokko, E. G., Conner, R. L., Lee, B., Kuzyk, A. D. and Kozu, G. C.** (2000) Quantification

848 of common root rot symptoms in resistant and susceptible barley by image analysis.

849 *Can. J. Plant Pathol.* **22**, 38-43.

850

851 **Krattinger, S. G., Lagudah, E. S., Spielmeier, W., Singh, R. P., Huerta-Espino, J.,**

852 **McFadden, H., Bossolini, E., Selter, L. L. and Keller, B.** (2009) A Putative ABC

853 Transporter Confers Durable Resistance to Multiple Fungal Pathogens in Wheat. *Science,*

854 **323**, 1360-1363.

855

856 **Krogh, A., Larsson, B., von Heijne, G. and Sonnhammer, E. L. L. (2001)**

857 Predicting transmembrane protein topology with a hidden Markov model: Application  
858 to complete genomes. *J of Mol. Bio.* **305**(3):567-580.

859

860 **Kulkarni, R. D., Kelkar, H. S. and Dean, R. A. (2003)** An eight-cysteine-containing

861 CFEM domain unique to a group of fungal membrane proteins. *Trends Biochem. Sci.* **28**,  
862 118-121.

863

864 **Langmead B, and Salzberg S. (2012)** Fast gapped-read alignment with Bowtie 2.

865 *Nature Methods.* **9**:357-359.

866

867

868 Lannou, C. (2011) Variation and Selection of Quantitative Traits in Plant Pathogens.

869 *Annu. Rev. Phytopathol.* **50**, 319-338.

870

871 **Larraya, L. M., Alfonso, M., Pisabarro, A. G. and Ramirez, L. (2003)** Mapping of

872 genomic regions (quantitative trait loci) controlling production and quality in industrial

873 cultures of the edible basidiomycete *Pleurotus ostreatus*. *Appl. Environ. Microbiol.*

874 **69**(6):3617-3625.

875

876 **Lendenmann, M. H., Croll, D., Stewart, E. L., & McDonald, B. A. (2014)** Quantitative

877 trait locus mapping of melanization in the plant pathogenic fungus *Zymoseptoria tritici*.

878 *G3.* **4**(12), 2519–2533.

879

- 880 **Lendenmann, M. H., Croll, D. and McDonald, B. A.** (2015) QTL mapping of fungicide  
881 sensitivity reveals novel genes and pleiotropy with melanization in the pathogen  
882 *Zymoseptoria tritici*. *Fungal Genet. Biol.* **80**, 53-67.
- 883
- 884 **Lendenmann, M. H., Croll, D., Palma-Guerrero, J., Stewart, E. L. and McDonald, B. A.**  
885 (2016) QTL mapping of temperature sensitivity reveals candidate genes for thermal  
886 adaptation and growth morphology in the plant pathogenic fungus *Zymoseptoria tritici*.  
887 *Heredity*, **116**, 384-394.
- 888
- 889 **Lo Presti, L., Lanver, D., Schweizer, G., Tanaka, S., Liang, L., Tollot, M., Zuccaro, A.,**  
890 **Reissmann, S. and Kahmann, R.** (2015) Fungal Effectors and Plant Susceptibility.  
891 *Annu. Rev. Plant. Biol.* **66**, 513-545.
- 892
- 893 **Lin, X., Huang, J. C., Mitchell, T. G. and Heitman, J.** (2006) Virulence Attributes and  
894 Hyphal Growth of *C. neoformans* Are Quantitative Traits and the *MAT $\alpha$*  Allele Enhances  
895 Filamentation. *PLoS Genet.* **2**, e187.
- 896
- 897 **Lind, M., Dalman, K., Stenlid, J., Karlsson, B. and Olson, Å.** (2007) Identification of  
898 quantitative trait loci affecting virulence in the basidiomycete *Heterobasidion annosum*  
899 *s.l.* *Curr. Genet.* **52**, 35-44.
- 900
- 901 **Liu, Z., Friesen, T. L., Ling, H., Meinhardt, S. W., Oliver, R. P., Rasmussen, J. B. and**  
902 **Faris, J. D.** (2006) The *Tsn1-ToxA* interaction in the wheat-*Stagonospora nodorum*  
903 pathosystem parallels that of the wheat-tan spot system. *Genome*, **49**, 1265-1273.
- 904

905 **Ma, L.-J., van der Does, H. C., Borkovich, K. A., Coleman, J. J., Daboussi, M.-J., Di**  
906 **Pietro, A., Dufresne, M., Freitag, M., Grabherr, M., Henrissat, B., Houterman, P. M.,**  
907 **Kang, S., Shim, W.-B., Woloshuk, C., Xie, X., Xu, J.-R., Antoniw, J., Baker, S. E., Bluhm,**  
908 **B. H., Breakspear, A., Brown, D. W., Butchko, R. A. E., Chapman, S., Coulson, R.,**  
909 **Coutinho, P. M., Danchin, E. G. J., Diener, A., Gale, L. R., Gardiner, D. M., Goff, S.,**  
910 **Hammond-Kosack, K. E., Hilburn, K., Hua-Van, A., Jonkers, W., Kazan, K., Kodira, C.**  
911 **D., Koehrsen, M., Kumar, L., Lee, Y.-H., Li, L., Manners, J. M., Miranda-Saavedra, D.,**  
912 **Mukherjee, M., Park, G., Park, J., Park, S.-Y., Proctor, R. H., Regev, A., Ruiz-Roldan,**  
913 **M. C., Sain, D., Sakthikumar, S., Sykes, S., Schwartz, D. C., Turgeon, B. G., Wapinski,**  
914 **I., Yoder, O., Young, S., Zeng, Q., Zhou, S., Galagan, J., Cuomo, C. A., Kistler, H. C. and**  
915 **Rep, M. (2010) Comparative genomics reveals mobile pathogenicity chromosomes in**  
916 **Fusarium. *Nature*. **464**, 367-373.**  
917  
918 **Mackay, T. F. C. (2001) The Genetic Architecture of Quantitative Traits. *Annu. Rev.***  
919 ***Genet.* **35**, 303-339.**  
920  
921 **Martin, D. P. and Rybicki, E. P. (1998) Microcomputer-Based Quantification of Maize**  
922 **Streak Virus Symptoms in *Zea mays*. *Phytopathology*. **88**, 422-427.**  
923  
924 **McKenna, A., Hanna, M., Banks, E., Sivachenko, A., Cibulskis, K., Kernytsky, A.,**  
925 **Garimella, K., Altshuler, D., Gabriel, S., Daly, M. and DePristo, M. A. (2010) The**  
926 **Genome Analysis Toolkit: A MapReduce framework for analyzing next-generation DNA**  
927 **sequencing data. *Genome Res.* **20**, 1297-1303.**  
928

- 929 **de Mendiburu, F.** (2014) *Agricolae*: Statistical procedures for agricultural research. R  
930 package version 1.1-8. <http://CRAN.R-project.org/package=agricolae>  
931
- 932 **Miao, V. P., Covert, S. F. and VanEtten, H. D.** (1991) A fungal gene for antibiotic  
933 resistance on a dispensable ("B") chromosome. *Science*. **254**, 1773-1776.  
934
- 935 **Mirzadi Gohari, A., Ware, S. B., Wittenberg, A. H. J., Mehrabi, R., Ben M'Barek, S.,**  
936 **Verstappen, E. C. P., van der Lee, T. A. J., Robert, O., Schouten, H. J., de Wit, P. P. J. G.**  
937 **M. and Kema, G. H. J.** (2015) Effector discovery in the fungal wheat pathogen  
938 *Zymoseptoria tritici*. *Mol Plant Pathol*. **16**, 931-945.  
939
- 940 **Morgan, T. H., Sturtevant, A. H., Muller, H. J., and C. B. Bridges** (1915) *The*  
941 *Mechanism of Mendelian Heredity*. New York: Henry Holt and Company.  
942
- 943 **Navaro, D.** (2015) lsr: Companion to "Learning Statistics with R". [https://cran.r-](https://cran.r-project.org/web/packages/lsr/)  
944 [project.org/web/packages/lsr/](https://cran.r-project.org/web/packages/lsr/)  
945
- 946 **Nosanchuk, J. D. and Casadevall, A.** (2003) The contribution of melanin to microbial  
947 pathogenesis. *Cell. Microbiol*. **5**, 203-223.  
948
- 949 **Nosanchuk, J. D. and Casadevall, A.** (2006) Impact of Melanin on Microbial Virulence  
950 and Clinical Resistance to Antimicrobial Compounds. *Antimicrob. Agents Chemother*. **50**,  
951 3519-3528.  
952

- 953 **O’Driscoll, A., Kildea, S., Doohan, F., Spink, J. and Mullins, E.** (2014) The wheat–  
954 Septoria conflict: a new front opening up? *Trends Plant Sci.* **19**, 602-610.  
955
- 956 **Oliver, R. P., Friesen, T. L., Faris, J. D. and Solomon, P. S.** (2012) *Stagonospora*  
957 *nodorum*: From Pathology to Genomics and Host Resistance. *Annu. Rev. Phytopathol.* **50**,  
958 23-43.  
959
- 960 **Palma-Guerrero, J., Torriani, S. F. F., Zala, M., Carter, D., Courbot, M., Rudd, J. J.,**  
961 **McDonald, B. A. and Croll, D.** (2016) Comparative transcriptomic analyses of  
962 *Zymoseptoria tritici* strains show complex lifestyle transitions and intraspecific  
963 variability in transcription profiles. *Mol Plant Pathol.* DOI: 10.1111/mpp.12333  
964
- 965 **Paaby, A. B. and Rockman, M. V.** (2013) The many faces of pleiotropy. *Trends Genet.*  
966 **29**, 66-73.  
967
- 968 **Pariaud, B., Robert, C., Goyeau, H. and Lannou, C.** (2009) Aggressiveness  
969 Components and Adaptation to a Host Cultivar in Wheat Leaf Rust. *Phytopathology.* **99**,  
970 869-878.  
971
- 972 **Parlevliet, J. E.** (1979) Components of Resistance that Reduce the Rate of Epidemic  
973 Development. *Annu. Rev. Phytopathol.* **17**, 203-222.  
974
- 975 **Petersen, T. N., Brunak, S., von Heijne, G. and Nielsen, H.** (2011) SignalP 4.0:  
976 discriminating signal peptides from transmembrane regions. *Nat. Meth.* **8**, 785-786.  
977



- 978 **Pfeifer, B., Wittelsbürger, U., Ramos-Onsins, S. E., & Lercher, M. J.** (2014)  
979 PopGenome: an efficient Swiss army knife for population genomic analyses in R. *Mol.*  
980 *Bio. Evol.* **31**(7), 1929–1936.
- 981
- 982 **Poppe, S., Dorsheimer, L., Happel, P. and Stukenbrock, E. H.** (2015) Rapidly Evolving  
983 Genes Are Key Players in Host Specialization and Virulence of the Fungal Wheat  
984 Pathogen *Zymoseptoria tritici*(*Mycosphaerella graminicola*). *PLoS Pathog.* **11**, e1005055.
- 985
- 986 **Portnoy, D. A., Auerbuch, V. and Glomski, I. J.** (2002) The cell biology of *Listeria*  
987 *monocytogenes* infection: the intersection of bacterial pathogenesis and cell-mediated  
988 immunity. *J. Cell Biol.* **158**, 409-414.
- 989
- 990 **R Core Team.** (2012) R: A language and environment for statistical computing. R  
991 Foundation for Statistical Computing, Vienna. <http://www.R-project.org/>
- 992
- 993 **Rasband, W.S.** (1997-2015) ImageJ; U.S. National Institutes of Health, Bethesda, MD.  
994 (<http://imagej.nih.gov/ij/>).
- 995
- 996 **Reese, M. L., Zeiner, G. M., Saeij, J. P. J., Boothroyd, J. C. and Boyle, J. P.** (2011)  
997 Polymorphic family of injected pseudokinases is paramount in *Toxoplasma* virulence.  
998 *Proc. Natl. Acad. Sci.* **108**, 9625-9630.
- 999
- 1000 **Schieltzeth, H.** (2010) Simple means to improve the interpretability of regression  
1001 coefficients. *Methods Ecol. Evol.* **1**, 103-113.
- 1002

1003 **Shaaban, M., Palmer, J. M., El-Naggar, W. A., El-Sokkary, M. A., Habib, E. L. S. E. and**

1004 **Keller, N. P.** (2010) Involvement of transposon-like elements in penicillin gene cluster

1005 regulation. *Fungal Genet. Biol.* **47**, 423-432.

1006

1007 **Smit A.F.A., Hubley R., Green P.** (2013-2015) RepeatMasker Open-4.0.

1008 <http://www.repeatmasker.org>.

1009

1010 **Solberg Woods, L. C.** (2014) QTL mapping in outbred populations: successes and

1011 challenges. *Physiol. Genomics.* **46**, 81-90.

1012

1013 **Sommerhalder, R. J., McDonald, B. A., Mascher, F. and Zhan, J.** (2010) Sexual

1014 Recombinants Make a Significant Contribution to Epidemics Caused by the Wheat

1015 Pathogen *Phaeosphaeria nodorum*. *Phytopathology.* **100**, 855-862.

1016

1017 **St.Clair, D. A.** (2010) Quantitative Disease Resistance and Quantitative Resistance Loci

1018 in Breeding. *Annu. Rev. Phytopathol.* **48**, 247-268.

1019

1020 **Stefansson, T. S., McDonald, B. A. and Willi, Y.** (2013) Local adaptation and

1021 evolutionary potential along a temperature gradient in the fungal pathogen

1022 *Rhynchosporium commune*. *Evol. Appl.* **6**, 524-534.

1023

1024 **Stergiopoulos, I. and de Wit, P. J. G. M.** (2009) Fungal Effector Proteins. *Annu. Rev.*

1025 *Phytopathol.* **47**, 233-263.

1026

- 1027 **Stewart, E. L. and McDonald, B. A.** (2014) Measuring Quantitative Virulence in the  
1028 Wheat Pathogen *Zymoseptoria tritici* Using High-Throughput Automated Image  
1029 Analysis. *Phytopathology*. **104**, 985-992.  
1030
- 1031 **Stewart, E. L, Hagerty, C. H., Mikaberidze, A., Mundt, C. C., Zhong, Z. and McDonald,**  
1032 **B. A.** (2016) An improved method for measuring quantitative resistance to the wheat  
1033 pathogen *Zymoseptoria tritici* using high throughput automated image analysis.  
1034 *Phytopathology*. <http://dx.doi.org/10.1094/PHYTO-01-16-0018-R>  
1035
- 1036 **Stukenbrock, E. H. and McDonald, B. A.** (2009) Population Genetics of Fungal and  
1037 Oomycete Effectors Involved in Gene-for-Gene Interactions. *Mol. Plant Microbe Interact.*  
1038 **22**, 371-380.  
1039
- 1040 **Stukenbrock, E. H., Jorgensen, F. G., Zala, M., Hansen, T. T., McDonald, B. A. and**  
1041 **Schierup, M. H.** (2010) Whole-Genome and Chromosome Evolution Associated with  
1042 Host Adaptation and Speciation of the Wheat Pathogen *Mycosphaerella graminicola*.  
1043 *PLoS Genet.* **6**, e1001189.  
1044
- 1045 **Su, C., Howe, D. K., Dubey, J. P., Ajioka, J. W. and Sibley, L. D.** (2002) Identification of  
1046 quantitative trait loci controlling acute virulence in *Toxoplasma gondii*. *Proc. Natl. Acad.*  
1047 *Sci.* **99**, 10753-10758.  
1048
- 1049 **Suffert, F., Sache, I., Lannou, C.** (2013) Assessment of quantitative traits of  
1050 aggressiveness in *Mycosphaerella graminicola* on adult wheat plants. *Plant Pathol.* **62**,  
1051 1330-1341.

1052

1053 **Tajima, F.** (1989) Statistical method for testing the neutral mutation hypothesis by DNA  
1054 polymorphism. *Genetics*. **123**(3), 585–595.

1055

1056 **Twizeyimana, M., Ojiambo, P. S., Bandyopadhyay, R. and Hartman, G. L.** (2014) Use  
1057 of Quantitative Traits to Assess Aggressiveness of *Phakopsora pachyrhizi* Isolates from  
1058 Nigeria and the United States. *Plant Dis.* **98**, 1261-1266.

1059

1060 **Wittenberg, A. H. J., van der Lee, T. A. J., Ben M'Barek, S., Ware, S. B., Goodwin, S. B.,**  
1061 **Kilian, A., Visser, R. G. F., Kema, G. H. J. and Schouten, H. J.** (2009) Meiosis Drives  
1062 Extraordinary Genome Plasticity in the Haploid Fungal Plant Pathogen *Mycosphaerella*  
1063 *graminicola*. *PLoS ONE*. **4**, e5863.

1064

1065 **Xie, W., Yu, K., Pauls, K. P. and Navabi, A.** (2011) Application of Image Analysis in  
1066 Studies of Quantitative Disease Resistance, Exemplified Using Common Bacterial Blight–  
1067 Common Bean Pathosystem. *Phytopathology*. **102**, 434-442.

1068

1069 **Yang, L., Gao, F., Shang, L., Zhan, J. and McDonald, B. A.** (2013) Association between  
1070 Virulence and Triazole Tolerance in the Phytopathogenic Fungus *Mycosphaerella*  
1071 *graminicola*. *PLoS ONE*. **8**, e59568.

1072

1073 **Zhan, J., Mundt, C. C., Hoffer, M. E. and McDonald, B. A.** (2002) Local adaptation and  
1074 effect of host genotype on the rate of pathogen evolution: an experimental test in a plant  
1075 pathosystem. *Evolutionary Biology*. **15**, 634-647.

1076

1077 **Zhan, J., Linde, C. C., Jurgens, T., Merz, U., Steinebrunner, F. and McDonald, B. A.**

1078 (2005) Variation for neutral markers is correlated with variation for quantitative traits

1079 in the plant pathogenic fungus *Mycosphaerella graminicola*. *Mol. Ecol.* **14**(9):2683-2693.

1080

1081 **Zhan, J., Torriani, S. F. F. and McDonald, B. A.** (2007) Significant difference in

1082 pathogenicity between *MAT1-1* and *MAT1-2* isolates in the wheat pathogen

1083 *Mycosphaerella graminicola*. *Fungal Genet. Biol.* **44**, 339-346.

1084

1085 **Zhang, Z.-N., Wu, Q.-Y., Zhang, G.-Z., Zhu, Y.-Y., Murphy, R. W., Liu, Z. and Zou, C.-G.**

1086 (2015) Systematic analyses reveal uniqueness and origin of the CFEM domain in fungi.

1087 *Scientific Reports.* **5**, 13032.

1088

1089 **Zwiers, L.-H., Roohparvar, R. and de Waard, M. A.** (2007) *MgAtr7*, a new type of ABC

1090 transporter from *Mycosphaerella graminicola* involved in iron homeostasis. *Fungal*

1091 *Genet. Biol.* **44**, 853-863.

1092

1093

1094

1095 **Tables**

1096

1097

Table 1. Significant QTLs for *in planta* virulence traits from *Z. tritici* mapping populations 3D1x3D7 (A) and 1A5x1E4 (B) on wheat cultivars Runal and Titlis.

A

| Cultivar | Phenotype                    | Chr | LOD Score | Variance      | LOD Threshold | p value | Confidence Interval (Mb) | Number of Genes | Mean Phenotype (3D1 allele) | Mean Phenotype (3D7 allele) |
|----------|------------------------------|-----|-----------|---------------|---------------|---------|--------------------------|-----------------|-----------------------------|-----------------------------|
|          |                              |     |           | Explained (%) |               |         |                          |                 |                             |                             |
| Runal    | PLACL                        | 7   | 43.7      | 53.9          | 3.34          | <0.001  | 1.75-1.91                | 35              | 38.98                       | 78.19                       |
| Runal    | Pycnidia per cm <sup>2</sup> | 7   | 48.2      | 57.3          | 3.30          | <0.001  | 1.75-1.91                | 35              | 11.26                       | 34.23                       |
| Runal    | Grey Value <sup>†</sup>      | 7   | 11.4      | 18.1          | 3.29          | <0.001  | 1.18-1.91                | 227             | 71.72                       | 78.44                       |

B

| Cultivar | Phenotype                                           | Chr | LOD Score | Variance      | LOD Threshold | p value | Confidence Interval (Mb) | Number of Genes | Mean Phenotype (1A5 allele) | Mean Phenotype (1E4 allele) |
|----------|-----------------------------------------------------|-----|-----------|---------------|---------------|---------|--------------------------|-----------------|-----------------------------|-----------------------------|
|          |                                                     |     |           | Explained (%) |               |         |                          |                 |                             |                             |
| Runal    | Pycnidia per cm <sup>2</sup>                        | 3   | 4.9       | 8.6           | 3.38          | 0.003   | 1.27-1.87                | 209             | 24.79                       | 32.13                       |
| Runal    | Pycnidia per cm <sup>2</sup>                        | 5   | 3.8       | 7.0           | 3.38          | 0.018   | 0.14-0.23                | 280             | 31.02                       | 26.60                       |
| Runal    | Pycnidia Size (mm <sup>2</sup> x 10 <sup>-3</sup> ) | 3   | 5.1       | 8.7           | 3.33          | 0.001   | 1.27-1.98                | 143             | 4.773                       | 4.998                       |
| Runal    | Grey Value <sup>†</sup>                             | 5   | 4.7       | 8.1           | 3.31          | 0.001   | 0.14-0.15                | 89              | 88.06                       | 84.74                       |
| Titlis   | Pycnidia per cm <sup>2</sup>                        | 5   | 4.15      | 7.2           | 3.38          | 0.006   | 1.36-2.27                | 280             | 28.03                       | 22.62                       |
| Titlis   | Pycnidia per cm <sup>2</sup>                        | 9   | 3.51      | 6.1           | 3.38          | 0.045   | 3.20-9.19                | 204             | 22.37                       | 28.01                       |
| Titlis   | PLACL                                               | 5   | 4.56      | 8.0           | 3.17          | 0.015   | 1.36-2.27                | 280             | 95.49                       | 90.40                       |

<sup>†</sup>The grey scale ranges from 0 (black) to 255 (white). Lower values indicate darker pycnidia.

Table 2. Additive allele effects for pycnidia density in cross 1A5x1E4 for cultivars Runal (A) and Titlis (B). Chromosome alleles represent the parental allele of the marker at the QTL peak. Phenotypes are the mean pycnidia density of all isolates with the corresponding allele combination. Superscript letters denote significant differences. n represents the number of isolates with each allele combination.

A

| Cultivar | Chr 3<br>allele | Chr 5<br>allele | Mean<br>Phenotype  | n  |
|----------|-----------------|-----------------|--------------------|----|
| Runal    | 1E4             | 1A5             | 39.28 <sup>a</sup> | 43 |
| Runal    | 1A5             | 1A5             | 26.10 <sup>b</sup> | 32 |
| Runal    | 1E4             | 1E4             | 26.96 <sup>b</sup> | 44 |
| Runal    | 1A5             | 1E4             | 23.09 <sup>c</sup> | 46 |

B

| Cultivar | Chr 5<br>allele | Chr 9<br>allele | Mean<br>Phenotype  | n  |
|----------|-----------------|-----------------|--------------------|----|
| Titlis   | 1A5             | 1E4             | 33.38 <sup>a</sup> | 37 |
| Titlis   | 1A5             | 1A5             | 25.00 <sup>b</sup> | 41 |
| Titlis   | 1E4             | 1E4             | 25.15 <sup>b</sup> | 54 |
| Titlis   | 1E4             | 1A5             | 20.11 <sup>c</sup> | 36 |



Table 3. Re-annotated candidate genes located in a QTL for pycnidia density and PLACL on chromosome 7 in *Z. tritici*. Superscripts denote the source of the gene annotation: <sup>a</sup> new genes not present in previous annotations, <sup>b</sup> annotations modified from existing annotations, <sup>c</sup> annotation from the JGI reference annotation, <sup>d</sup> annotation from Grandaubert et al. (2015).

| Gene Name                       | Description                                                        | Protein Length | Signal Peptide | TM Domain |
|---------------------------------|--------------------------------------------------------------------|----------------|----------------|-----------|
| Zt_QTL7_1 <sup>a</sup>          | NA                                                                 | 504            | N              | N         |
| Zt_QTL7_2 <sup>a</sup>          | NA                                                                 | 228            | Y              | N         |
| Zt_QTL7_3 <sup>a</sup>          | NA                                                                 | 357            | N              | N         |
| Zt_QTL7_4 <sup>b</sup>          | Hypothetical protein                                               | 471            | N              | Y         |
| Zt_QTL7_5 <sup>a</sup>          | NA                                                                 | 198            | Y              | N         |
| Zt_QTL7_6 <sup>b</sup>          | AMP-binding enzyme family                                          | 921            | N              | Y         |
| Zt_QTL7_7 <sup>b</sup>          | Serine carboxypeptidase                                            | 966            | N              | N         |
| Zt_QTL7_8 <sup>b</sup>          | Hypothetical protein                                               | 879            | N              | N         |
| Mycgr3T100839 <sup>c</sup>      | Fe-containing alcohol dehydrogenase,                               | 1251           |                |           |
|                                 |                                                                    |                | N              | N         |
| Mycgr3T100840 <sup>c</sup>      | Vacuolar membrane pq loop repeat                                   | 972            | N              | Y         |
| Mycgr3T105313 <sup>c</sup>      | Trichothecene efflux pump                                          | 1788           | N              | Y         |
| Mycgr3T44611 <sup>c</sup>       | Radical s-adenosyl methionine domain-containing 2                  | 1074           |                |           |
|                                 |                                                                    |                | N              | Y         |
| Mycgr3T44946 <sup>c</sup>       | Hypothetical protein                                               | 666            | N              | N         |
| Mycgr3T45542 <sup>c</sup>       | Lipoate- ligase B                                                  | 720            | N              | N         |
| Mycgr3T74280 <sup>c</sup>       | Prolyl 4-hydroxylase                                               | 1503           | N              | N         |
| Mycgr3T94634 <sup>c</sup>       | Hypothetical protein                                               | 525            | N              | N         |
| Mycgr3T94648 <sup>c</sup>       | Hypothetical protein                                               | 1143           | N              | N         |
| Mycgr3T94659 <sup>c</sup>       | Hypothetical protein                                               | 972            | N              | N         |
| Zt09_model_7_00553 <sup>d</sup> | Ferric-chelate reductase (Fre2)                                    | 2085           | N              | Y         |
| Zt09_model_7_00555 <sup>d</sup> | Hypothetical protein                                               | 255            | N              | N         |
| Zt09_model_7_00556 <sup>d</sup> | Hypothetical protein                                               | 1038           | N              | N         |
| Zt09_model_7_00557 <sup>d</sup> | Hypothetical protein                                               | 378            | N              | N         |
| Zt09_model_7_00558 <sup>d</sup> | Major allergen alt a1, partial                                     | 540            | Y              | N         |
| Zt09_model_7_00559 <sup>d</sup> | Hypothetical protein                                               | 789            | N              | Y         |
| Zt09_model_7_00561 <sup>d</sup> | Hypothetical protein                                               | 1302           | N              | N         |
| Zt09_model_7_00562 <sup>d</sup> | Hypothetical protein                                               | 3663           | Y              | N         |
| Zt09_model_7_00563 <sup>d</sup> | Hypothetical protein                                               | 1851           | N              | N         |
| Zt09_model_7_00564 <sup>d</sup> | Hypothetical protein                                               | 1761           | N              | Y         |
| Zt09_model_7_00567 <sup>d</sup> | Hypothetical protein                                               | 651            | N              | N         |
| Zt09_model_7_00569 <sup>d</sup> | Acid phosphatase                                                   | 456            | N              | Y         |
| Zt09_model_7_00571 <sup>d</sup> | Adenylate kinase                                                   | 696            | N              | N         |
| Zt09_model_7_00573 <sup>d</sup> | NA                                                                 | 420            | N              | N         |
| Zt09_model_7_00574 <sup>d</sup> | Glycoside hydrolase                                                | 933            | N              | N         |
| Zt09_model_7_00575 <sup>d</sup> | Glycoside hydrolase family 36                                      | 2238           | Y              | N         |
| Zt09_model_7_00577 <sup>d</sup> | Ca <sup>2+</sup> -modulated nonselective cation channel polycystin | 1917           |                |           |
|                                 |                                                                    |                | Y              | N         |
| Zt09_model_7_00578 <sup>d</sup> | Urease accessory                                                   | 780            | N              | N         |
| Zt09_model_7_00579 <sup>d</sup> | CFEM domain-containing                                             | 1230           | Y              | Y         |
| Zt09_model_7_00581 <sup>d</sup> | Hypothetical protein                                               | 294            | N              | N         |

## **Figure Legends**

Figure 1. Frequency histograms of virulence phenotypes from the *Z. tritici* mapping populations 3D1x3D7 (upper panels) and 1A5x1E4 (lower panels) on the wheat cultivars Runal (white bars) and Titlis (grey bars). Vertical lines represent phenotype values of the parent isolates, dotted line represents 3D1 and 1A5, dashed line represents 3D7 and 1E4.

Figure 2. LOD (logarithm of the odds) plots from QTL mapping of virulence traits in the *Z. tritici* mapping populations 3D1x 3D7 (A) and 1A5x1E4 (B) for the 13 core chromosomes (x axis). The dashed horizontal line represents the 0.05 significance threshold calculated with 1000 permutations.

Figure 3. Population genomic characterization of the QTL located on chromosome 7 (region 1746 kb to 1909 kb) in the reference isolate IPO323 and a population of 28 *Zymoseptoria tritici* isolates drawn from a single field in Switzerland. (A). GC content in the IPO323 reference genome. (B). SNPs density (bottom) and genotyping rate (top) in the 28 field isolates. Black rectangles represent the frequency of missing SNP genotypes. The horizontal line represents the mean SNP density across chromosome 7 in the 28 isolates. (C). Transposable element locations in the IPO323 reference genome. (D). *Bottom:* Location of coding sequences in the IPO323 reference genome. *Top:* Frequency of the allele carried by 3D7 in the 28 field isolates for the SNPs shared by the 3D1 and 3D7 parents in the gene coding sequences. (E). SNP density per kb in the coding sequences of the genes. Only SNPs with a genotyping rate  $\geq 90\%$  were

included. (F). Tajima's D statistic per gene coding sequence. Tajima's D values for genes with less than 10 SNPs are not shown.

Figure 4. Gene expression profiles of *Zymoseptoria tritici* candidate genes at 7, 12, 14 and 28 days post infection (DPI). Solid red lines represent parent isolate 3D1, dashed blue lines represent parent isolate 3D7.

### **Supplementary Figures**

Figure S1. Genes previously implicated in virulence for *Z. tritici*. Adapted from Orton et al, 2011.

Figure S2. Typical microscope images of *Z. tritici* pycnidiospores showing many long, overlapping spores (top left) and short, less dense spores (top right). Yellow lines represent spores counted and measured via a semi-automated ImageJ macro (bottom panels).

Figure S3. GFF file containing details of the re-annotated genes in the chromosome 7 QTL.

Figure S4. blast2go results for the chromosome 7 QTL.
